# Supplementary material for: Correlation between Eye Movements and Asthenopia: A Prospective Observational Study
Source: MDPI journal article supplement (doi:10.3390/jcm11237043), 2022-11-28
Supplement: s1 [file s1]

Supplementary Table S1. Computer vision syndrome questionnaire scores frequency

|                                     | Scores       |              |             |
|-------------------------------------|--------------|--------------|-------------|
|                                     | 0            | 1            | 2           |
| Burning                             | 50 ( 53.8% ) | 43 ( 46.2% ) | 0 ( 0% )    |
| Itching                             | 25 ( 26.9% ) | 66 ( 71% )   | 1 ( 1.1% )  |
| Feeling of a foreign body           | 39 ( 41.9% ) | 53 ( 57% )   | 1 ( 1.1% )  |
| Tearing                             | 35 ( 37.6% ) | 55 ( 59.1% ) | 3 ( 3.2% )  |
| Excessive blinking                  | 50 ( 53.8% ) | 36 ( 38.7% ) | 7 ( 7.5% )  |
| Eye redness                         | 45 ( 48.4% ) | 45 ( 48.4% ) | 3 ( 3.2% )  |
| Eye pain                            | 49 ( 52.7% ) | 43 ( 46.2% ) | 1 ( 1.1% )  |
| Heavy eyelids                       | 70 ( 75.3% ) | 21 ( 22.6% ) | 2 ( 2.2% )  |
| Dryness                             | 9 ( 9.7% )   | 67 ( 72% )   | 17 (18.3% ) |
| Blurred vision                      | 36 ( 38.7% ) | 48 ( 51.6% ) | 9 ( 9.7% )  |
| Double vision                       | 54 ( 58.1% ) | 36 ( 38.7% ) | 3 ( 3.2% )  |
| Difficulty focusing for near vision | 72 ( 77.4% ) | 18 ( 19.4% ) | 3 ( 3.2% )  |
| Increased sensitivity to light      | 40 ( 43% )   | 47 ( 50.5% ) | 6 ( 6.5% )  |
| Colored halos                       | 68 ( 73.1% ) | 25 ( 26.9% ) | 0 ( 0% )    |
| Feeling of sight worsening          | 23 ( 24.7% ) | 64 ( 68.8% ) | 6 ( 6.5% )  |
| Headache                            | 52 ( 55.9% ) | 39 ( 41.9% ) | 2 ( 2.2% )  |

---

Supplementary Table S2. Accommodation examination of all participants

---

|                                     | Median (InterQuartile Range, IQR) | (Q1, Q3)       |
|-------------------------------------|-----------------------------------|----------------|
| Accommodation amplitude (D)         | 10.0(2.0)                         | (8.0, 10.0)    |
| Accommodative response (D)          | 0 (0.5)                           | (-0.25, 0.25)  |
| Negative relative accommodation (D) | 1.75(1.25)                        | (1.00, 2.25)   |
| Positive relative accommodation (D) | -2.00(1.38)                       | (-2.50, -1.13) |
| Accommodative facility (cmp)        | 10(5)                             | (8, 13)        |

---

Supplementary Table S3. Eye movement parameters in first reading process

|                                  | Median<br>(InterQuartile Range, IQR) | Q1, Q3          |
|----------------------------------|--------------------------------------|-----------------|
| Time to first fixation (s)       | 0(0)                                 | (0,0)           |
| Fixations Before                 | 0(0)                                 | (0,0)           |
| First Fixation Duration (s)      | 0.27(0.21)                           | (0.10, 0.30)    |
| Fixation Duration Mean(s)        | 0.29(0.08)                           | (0.25, 0.34)    |
| Total Fixation Duration(s)       | 32.72(19.77)                         | (24.89, 45.93)  |
| Fixation count                   | 116(42)                              | (94.00, 139.50) |
| Visit Duration Mean(s)           | 13.97(12.68)                         | (8.88, 21.86)   |
| Total visit duration(s)          | 34.12(19.55)                         | (27.12, 47.32)  |
| Total visit count                | 2(2)                                 | (2,4)           |
| Reading speed (s <sup>-1</sup> ) | 0.13(0.075)                          | (0.10, 0.18)    |
| Regressive saccade (per line)    | 1(1.43)                              | (0.57, 2.00)    |
| Unknown saccade (per line)       | 0.43(0.86)                           | (0.14, 1.00)    |
